# Supplementary material for: On the path towards universal coverage of hepatitis C treatment among people receiving opioid agonist therapy (OAT) in Norway: a prospective cohort study from 2013 to 2017
Source: PubMed Central journal article supplement — BMJ Open. 2020 Aug 26;10(8):e036355. doi: 10.1136/bmjopen-2019-036355 (PMC7451452; doi:10.1136/bmjopen-2019-036355), 2020-08-26
Supplement: bmjopen-2019-036355supp001.pdf [file bmjopen-2019-036355supp001.pdf]

*Figure S1: Flow chart of study population*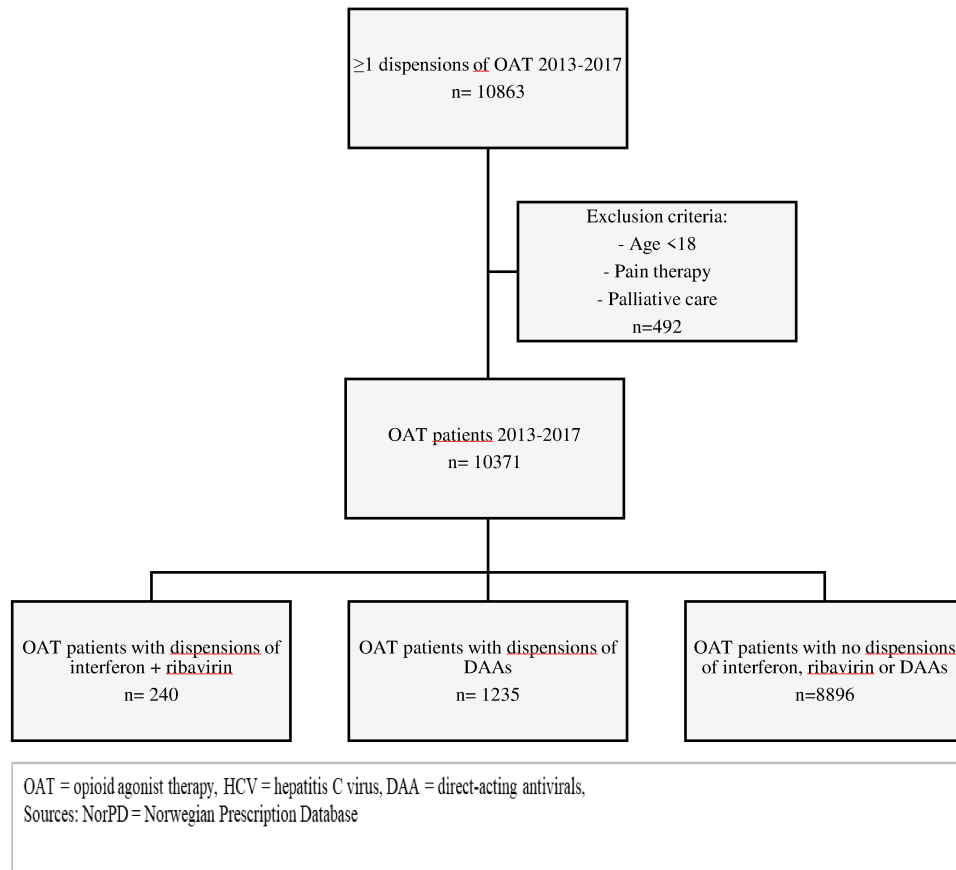

Table S1: ATC classification and dispensed DAAs among OAT patients in Norway from 2013 to 2017

| Description                                                         | ATC code             |
|---------------------------------------------------------------------|----------------------|
| <b>Anti-infective for systemic use</b>                              | J                    |
| Antivirals for treatment of HCV infection, DAAs                     | J05AP*               |
| Telaprevir                                                          | J05AP02              |
| Boceprevir                                                          | J05AP03              |
| Faldaprevir                                                         | J05AP04              |
| Simeprevir                                                          | J05AP05              |
| Asunaprevir                                                         | J05AP06              |
| Daclatasvir                                                         | J05AP07              |
| Sofosbuvir                                                          | J05AP08              |
| Dasabuvir                                                           | J05AP09              |
| Ledipasvir and Sofosbuvir                                           | J05AP51              |
| Dasabuvir, ombitasvir, paritaprevir and ritonavir                   | J05AP52              |
| Ombitasvir, paritaprevir and ritonavir                              | J05AP53              |
| Elbasvir and grazoprevir                                            | J05AP54              |
| Sofosbuvir and velpatasvir                                          | J05AP55              |
| Sofosbuvir, velpatasvir, and voxilaprevir                           | J05AP56              |
| Glecaprevir and pibrentasvir                                        | J05AP57              |
| <b>Most prevalent DAAs dispensed in Norway among OAT patients**</b> |                      |
|                                                                     | <b>Frequency (%)</b> |
| Elbasvir and grazoprevir                                            | 328 (27)             |
| Sofosbuvir                                                          | 279 (23)             |
| Ledipasvir and Sofosbuvir                                           | 225 (18)             |
| Sofosbuvir and velpatasvir                                          | 187 (15)             |
| Ombitasvir, paritaprevir and ritonavir                              | 55 (5)               |
| Daclatasvir                                                         | 47 (4)               |
| Dasabuvir                                                           | 34 (3)               |
| Simeprevir                                                          | 33 (3)               |
| Other                                                               | 37 (3)               |

ATC = Anatomical Therapeutic Chemical classification, OAT = opioid agonist therapy, DAA = direct-acting antivirals

Sources: NorPD = Norwegian Prescription Database

\*Excluding Ribavirin J05AP01

\*\*First registered dispensation by ATC. For sofosbuvir, daclatasvir, dasabuvir and simeprevir additional dispensations of other DAA/antivirals may occur.

*Table S1: Annual and cumulative chronic HCV treatment, crude, among OAT patients in Norway between 2013 and 2017*

|                                          | Source | 2013    | 2014    | 2015    | 2016    | 2017    | Total |
|------------------------------------------|--------|---------|---------|---------|---------|---------|-------|
| HCV treatment n (overall)                | NorPD  | 146     | 167     | 243     | 322     | 597     | 1475  |
| DAAAs, n                                 | NorPD  | 46      | 95      | 212     | 290     | 592     | 1235  |
| DAAAs % of HCV                           |        | 32      | 57      | 87      | 90      | 99      | 84    |
| Study population n, yearly incl. deaths  | NorPD  | 7709    | 7914    | 7958    | 7804    | 7709    | 10371 |
| Deaths                                   | NorPD  | 165     | 151     | 138     | 114     | 124     | 692   |
| Study population n, yearly, excl. deaths | NorPD  | 7544    | 7763    | 7820    | 7690    | 7585    | 9679  |
| <b>HCV treatment crude %:</b>            |        |         |         |         |         |         |       |
| HCV overall                              |        | 1.9     | 2.2     | 3.1     | 4.2     | 7.9     |       |
| DAAAs                                    |        | 0.6     | 1.2     | 2.7     | 3.8     | 7.8     |       |
| Cumulative frequency HCV overall         |        | 1.9     | 4.1     | 7.2     | 11.4    | 19.3    |       |
| Cumulative frequency DAAAs               |        | 0.6     | 1.8     | 4.5     | 8.3     | 16.1    |       |
| 95% Confidence interval (HCV)            |        | 1.6-2.3 | 1.8-2.5 | 2.7-3.5 | 3.7-4.6 | 7.3-8.5 |       |
| 95% Confidence interval (DAAAs)          |        | 0.4-0.8 | 1.0-1.5 | 2.4-3.1 | 3.4-4.2 | 7.2-8.4 |       |

OAT = opioid agonist therapy, HCV = hepatitis C virus, DAA = direct-acting antivirals,  
Sources: NorPD = Norwegian Prescription Database

Table S2: Annual and cumulative chronic HCV treatment coverage among OAT patients in Norway between 2013 and 2017 by Health Regions

|                                           | Source:                | 2013 | 2014 | 2015 | 2016 | 2017 | Total: |
|-------------------------------------------|------------------------|------|------|------|------|------|--------|
| Helse Sør-Øst HCV Treatment               | NorPD                  | 93   | 92   | 158  | 196  | 367  | 906    |
| Helse Vest HCV Treatment                  | NorPD                  | 24   | 27   | 36   | 64   | 136  | 287    |
| Helse Midt HCV Treatment                  | NorPD                  | 20   | 18   | 22   | 27   | 52   | 139    |
| Helse Nord HCV Treatment                  | NorPD                  | 6    | 27   | 27   | 20   | 26   | 106    |
| Study population incl death Helse Sør-Øst | NorPD                  | 4553 | 4636 | 4609 | 4575 | 4580 |        |
| Study population incl death Helse Vest    | NorPD                  | 1889 | 1971 | 2000 | 1833 | 1735 |        |
| Study population incl death Helse Midt    | NorPD                  | 708  | 728  | 731  | 742  | 740  |        |
| Study population incl death Helse Nord    | NorPD                  | 559  | 578  | 616  | 653  | 653  |        |
| Deaths Helse Sør-Øst                      | NorPD                  | 91   | 82   | 84   | 74   | 74   |        |
| Deaths Helse Vest                         | NorPD                  | 47   | 45   | 33   | 29   | 39   |        |
| Deaths Helse Midt                         | NorPD                  | 21   | 16   | 10   | 6    | 6    |        |
| Deaths Helse Nord                         | NorPD                  | 6    | 8    | 11   | 5    | 5    |        |
| Study population excl death Helse Sør-Øst | NorPD                  | 4462 | 4554 | 4525 | 4501 | 4506 |        |
| Study population excl death Helse Vest    | NorPD                  | 1842 | 1926 | 1967 | 1804 | 1696 |        |
| Study population excl death Helse Midt    | NorPD                  | 687  | 712  | 721  | 736  | 734  |        |
| Study population excl death Helse Nord    | NorPD                  | 553  | 570  | 605  | 648  | 648  |        |
| Prevalence HCV Helse Sør-Øst, mean %      | SERAF                  | 55   | 53   | 57   | 52   | 45   |        |
| Prevalence HCV Helse Vest, mean %         | SERAF                  | 43   | 51   | 50   | 47   | 41   |        |
| Prevalence HCV Helse Midt, mean %         | SERAF                  | 73   | 53   | 52   | 49   | 36   |        |
| Prevalence HCV Helse Nord, mean %         | SERAF                  | 45   | 48   | 43   | 33   | 28   |        |
| Prevalence HCV Helse Sør-Øst, n           | SERAF                  | 2454 | 2414 | 2579 | 2341 | 2028 |        |
| Prevalence HCV Helse Vest, n              | SERAF                  | 792  | 982  | 984  | 848  | 695  |        |
| Prevalence HCV Helse Midt, n              | SERAF                  | 502  | 377  | 375  | 361  | 264  |        |
| Prevalence HCV Helse Nord, n              | SERAF                  | 238  | 274  | 260  | 214  | 181  |        |
| Incidence HCV Helse Sør-Øst, PWIDs        | NIPH, Meijerick et al. | 249  | 233  | 238  | 236  | 238  |        |
| Incidence HCV Helse Vest, PWIDs           | NIPH, Meijerick et al. | 79   | 93   | 91   | 86   | 81   |        |
| Incidence HCV Helse Midt, PWIDs           | NIPH, Meijerick et al. | 44   | 39   | 35   | 41   | 33   |        |

|                                               |                       |     |      |      |      |      |
|-----------------------------------------------|-----------------------|-----|------|------|------|------|
| Incidence HCV Helse Nord, PWIDs               | NIPH, Mejerick et al. | 24  | 23   | 16   | 11   | 15   |
| Incidence HCV Helse Sør-Øst, OAT, n           | NIPH, Mejerick et al. | 175 | 163  | 167  | 165  | 167  |
| Incidence HCV Helse Vest, OAT, n              | NIPH, Mejerick et al. | 55  | 65   | 64   | 60   | 56   |
| Incidence HCV Helse Midt, OAT, n              | NIPH, Mejerick et al. | 30  | 27   | 25   | 29   | 23   |
| Incidence HCV Helse Nord, OAT, n              | NIPH, Mejerick et al. | 17  | 16   | 11   | 8    | 10   |
| <i>Treatment coverage HCV Helse Sør-Øst %</i> |                       | 3.5 | 3.5  | 5.7  | 7.8  | 16.7 |
| <i>Cumulative frequency HCV Helse Sør-Øst</i> |                       | 3.5 | 7.1  | 12.8 | 20.7 | 37.4 |
| <i>Treatment coverage HCV Helse Vest %</i>    |                       | 2.8 | 2.6  | 3.4  | 7.0  | 18.1 |
| <i>Cumulative frequency HCV Helse Vest</i>    |                       | 2.8 | 5.4  | 8.8  | 15.9 | 34.0 |
| <i>Treatment coverage HCV Helse Midt %</i>    |                       | 3.8 | 4.4  | 5.5  | 6.9  | 18.1 |
| <i>Cumulative frequency HCV Helse Midt</i>    |                       | 3.8 | 8.2  | 13.7 | 20.6 | 38.7 |
| <i>Treatment coverage HCV Helse Nord %</i>    |                       | 2.4 | 9.3  | 9.9  | 9.0  | 13.6 |
| <i>Cumulative frequency HCV Helse Nord</i>    |                       | 2.4 | 11.7 | 21.6 | 30.6 | 44.2 |

OAT = opioid agonist therapy, PWID = people who inject drugs, HCV = hepatitis C virus

Sources: NorPD = Norwegian Prescription Database, SERAF = The Norwegian Centre for Addiction Research, NIPH = Norwegian Institute for Public Health, Mejerink et al. (2017): Modelling the burden of hepatitis C infection among people who inject drugs in Norway, 1973–2030
